# Supplementary material for: The Efficacy of an Energy-Restricted Anti-Inflammatory Diet for the Management of Obesity in Younger Adults
Source: PubMed Central journal article supplement (PMC7700374; doi:10.3390/nu12113583), 2020-11-22
Supplement: nutrients-12-03583-s001.pdf [file nutrients-12-03583-s001.pdf]

**Table S1.** The changes in consumption of food items.

| Variable                             | Anti-inflammatory diet group |                 |            |                      | Control diet group |                 |            |                      | Baseline P-value <sup>d</sup> | Trial end P-Value <sup>e</sup> |
|--------------------------------------|------------------------------|-----------------|------------|----------------------|--------------------|-----------------|------------|----------------------|-------------------------------|--------------------------------|
|                                      | Baseline                     | Trial end       | Change (%) | P-value <sup>c</sup> | Baseline           | Trial end       | Change (%) | P-value <sup>c</sup> |                               |                                |
| Cereals and products (g/day)         | 194.34 (81.05)               | 111.62 (51.69)  | -42.56     | <0.001 <sup>a</sup>  | 252.86 (87.46)     | 231.85 (43.46)  | -8.31      | 0.231 <sup>a</sup>   | 0.029 <sup>a</sup>            | <0.001 <sup>a</sup>            |
| Milk and dairy products (g/day)      | 380.98 (254.66)              | 205.01 (100.48) | -46.19     | 0.002 <sup>a</sup>   | 398.72 (165.03)    | 388.93 (34.57)  | -2.46      | 0.135 <sup>a</sup>   | 0.777 <sup>a</sup>            | <0.001 <sup>a</sup>            |
| Eggs (g/day)                         | 24.81 (15.96)                | 31.57 (22.89)   | 27.25      | 0.314 <sup>a</sup>   | 37.00 (26.89)      | 30.26 (27.74)   | -18.22     | 0.199 <sup>b</sup>   | 0.073 <sup>b</sup>            | 0.816 <sup>a</sup>             |
| Meat and meat products (g/day)       | 214.70 (53.78)               | 180.55 (90.50)  | -15.91     | 0.002 <sup>a</sup>   | 244.65 (74.84)     | 188.72 (29.93)  | -22.86     | <0.001 <sup>a</sup>  | 0.124 <sup>a</sup>            | 0.677 <sup>a</sup>             |
| Fish (g/day)                         | 73.25 (50.24)                | 55.92 (42.32)   | -23.66     | 0.732 <sup>a</sup>   | 47.85 (23.82)      | 69.06 (35.25)   | 44.33      | 0.211 <sup>a</sup>   | 0.139 <sup>b</sup>            | 0.253 <sup>a</sup>             |
| Legumes (g/day)                      | 36.27 (33.92)                | 53.52 (47.58)   | 47.50      | 0.094 <sup>b</sup>   | 32.87 (15.52)      | 31.94 (27.28)   | -2.83      | 0.554 <sup>a</sup>   | 0.159 <sup>b</sup>            | 0.062 <sup>a</sup>             |
| Vegetables (g/day)                   | 345.14 (249.86)              | 636.65 (156.24) | 84.46      | <0.001 <sup>b</sup>  | 229.77 (106.06)    | 405.56 (102.93) | 76.51      | <0.001 <sup>a</sup>  | 0.044 <sup>b</sup>            | <0.001 <sup>a</sup>            |
| Potatoes (g/day)                     | 106.33 (67.95)               | 40.04 (48.05)   | -62.34     | <0.001 <sup>a</sup>  | 210.18 (119.14)    | 65.87 (38.49)   | -68.66     | <0.001 <sup>a</sup>  | <0.001 <sup>a</sup>           | 0.047 <sup>a</sup>             |
| Fruit (g/day)                        | 252.68 (102.91)              | 241.43 (89.76)  | -4.45      | 0.769 <sup>a</sup>   | 180.13 (105.68)    | 125.65 (44.87)  | -30.24     | 0.010 <sup>a</sup>   | 0.022 <sup>a</sup>            | <0.001 <sup>a</sup>            |
| Nuts (g/day)                         | 18.10 (24.08)                | 27.92 (12.87)   | 54.25      | <0.001 <sup>a</sup>  | 9.58 (11.24)       | 8.58 (6.03)     | -10.44     | 0.078 <sup>a</sup>   | 0.048 <sup>a</sup>            | <0.001 <sup>a</sup>            |
| Desserts (g/day)                     | 65.37 (44.64)                | 5.98 (8.35)     | -90.85     | <0.001 <sup>a</sup>  | 104.98 (52.09)     | 4.14 (14.03)    | -96.06     | <0.001 <sup>b</sup>  | 0.007 <sup>a</sup>            | 0.002 <sup>b</sup>             |
| Added fat (g/day)                    | 11.73 (7.21)                 | 13.64 (5.21)    | 16.28      | <0.001 <sup>b</sup>  | 15.17 (5.08)       | 8.76 (55.53)    | -42.25     | 0.809 <sup>b</sup>   | 0.064 <sup>a</sup>            | 0.012 <sup>a</sup>             |
| Coffee (g/day)                       | 147.83 (76.31)               | 112.86 (7.92)   | -23.66     | 0.779 <sup>a</sup>   | 101.73 (103.69)    | 95.31 (4.04)    | -6.31      | <0.001 <sup>a</sup>  | 0.061 <sup>b</sup>            | 0.195 <sup>a</sup>             |
| Fruit juice (ml/day)                 | 35.26 (63.08)                | 0.00 (23.05)    | -100.00    | <0.001 <sup>a</sup>  | 88.26 (145.83)     | 0.00 (37.49)    | -100.00    | <0.001 <sup>b</sup>  | 0.359 <sup>b</sup>            | -                              |
| Sweetened refreshing drinks (ml/day) | 37.33 (84.78)                | 0.00 (0.00)     | -100.00    | <0.001 <sup>a</sup>  | 45.94 (48.84)      | 0.00 (0.00)     | -100.00    | <0.001 <sup>a</sup>  | 0.583 <sup>a</sup>            | -                              |
| Alcoholic beverages (ml/day)         | 35.42 (65.06)                | 1.09 (5.21)     | -96.92     | <0.001 <sup>a</sup>  | 32.42 (40.64)      | 40.61 (55.53)   | 25.26      | <0.001 <sup>a</sup>  | 0.539 <sup>b</sup>            | 0.004 <sup>b</sup>             |

Data are presented as the mean (SD). <sup>a</sup> P <0.05 tested with Student t-test for dependent samples. <sup>b</sup> P <0.05 tested with Wilcoxon z-test for dependent samples. <sup>c</sup> Comparison within dietary groups (baseline and after 6 months). <sup>d</sup> Baseline differences between the AID and CD groups. <sup>e</sup> Differences after 6 months between the AID and CD groups.

**Table S2.** The distribution of participants according to BMI classification and metabolic syndrome at the end of the trial (n=81).

| <b>Variable</b>                 | <b>Anti-inflammatory<br/>diet group<br/>(42 (51.9))</b> | <b>Control diet group<br/>(39 (48.1))</b> | <b>P-value</b>     |
|---------------------------------|---------------------------------------------------------|-------------------------------------------|--------------------|
| Overweight                      | 9 (21.4)                                                | 10 (25.6)                                 | 0.628 <sup>a</sup> |
| Obesity, 1 <sup>st</sup> degree | 24 (57.1)                                               | 17 (43.6)                                 |                    |
| 2 <sup>nd</sup> degree          | 6 (14.3)                                                | 9 (23.1)                                  |                    |
| 3 <sup>rd</sup> degree          | 3 (7.1)                                                 | 3 (7.7)                                   |                    |
| Metabolic syndrome, Yes         | 14 (33.33)                                              | 13 (13.33)                                | 0.813 <sup>a</sup> |

Data are presented as number (%).<sup>a</sup> p <0.05 tested with  $\chi^2$  test for independent samples.

Table S3. The proportion of total energy intake from dietary components (%MJ)

| Variable             | Anti-inflammatory diet group |               |            |                      | Control diet group |               |            |                      | Baseline P-value <sup>d</sup> | Trial end P-Value <sup>e</sup> |
|----------------------|------------------------------|---------------|------------|----------------------|--------------------|---------------|------------|----------------------|-------------------------------|--------------------------------|
|                      | Baseline                     | Trial end     | Change (%) | P-value <sup>c</sup> | Baseline           | Trial end     | Change (%) | P-value <sup>c</sup> |                               |                                |
| <i>Protein</i>       | 17.16 (1.70)                 | 20.62 (2.63)  | 20.16      | <0.001 <sup>a</sup>  | 17.07 (1.97)       | 21.33 (1.86)  | 24.96      | <0.001 <sup>a</sup>  | 0.872 <sup>a</sup>            | 0.006 <sup>a</sup>             |
| <i>Carbohydrate</i>  | 38.59 (6.06)                 | 35.28 (7.71)  | -8.58      | <0.001 <sup>a</sup>  | 41.60 (4.71)       | 37.98 (3.72)  | -8.70      | 0.535 <sup>a</sup>   | 0.063 <sup>a</sup>            | 0.131 <sup>a</sup>             |
| <i>Fat</i>           | 42.63 (6.54)                 | 44.01 (6.19)  | 3.24       | 0.021 <sup>a</sup>   | 40.28 (3.65)       | 39.77 (3.69)  | -1.27      | 0.005 <sup>a</sup>   | 0.133 <sup>a</sup>            | 0.292 <sup>a</sup>             |
| <i>MUFA</i>          | 16.86 (4.48)                 | 21.37 (8.69)  | 26.75      | <0.001 <sup>a</sup>  | 14.75 (1.78)       | 15.98 (3.49)  | 8.34       | 0.856 <sup>a</sup>   | 0.018 <sup>a</sup>            | <0.001 <sup>a</sup>            |
| <i>PUFA</i>          | 7.14 (2.08)                  | 8.38 (2.88)   | 17.37      | 0.029 <sup>a</sup>   | 7.09 (0.77)        | 6.54 (1.18)   | -7.76      | 0.001 <sup>a</sup>   | 0.677 <sup>a</sup>            | <0.001 <sup>a</sup>            |
| <i>Omega-3</i>       | 0.44 (0.31)                  | 0.69 (0.43)   | 56.82      | <0.001 <sup>a</sup>  | 0.27 (0.09)        | 0.27 (0.14)   | 0.00       | 0.109 <sup>a</sup>   | 0.010 <sup>a</sup>            | <0.001 <sup>a</sup>            |
| <i>Omega-6</i>       | 0.27 (0.07)                  | 0.26 (0.15)   | -3.70      | 0.003 <sup>a</sup>   | 0.31 (0.07)        | 0.30 (0.11)   | -3.23      | 0.158 <sup>a</sup>   | 0.210 <sup>a</sup>            | 0.071 <sup>a</sup>             |
| <i>Saturated fat</i> | 15.58 (2.91)                 | 10.99 (24.62) | -29.46     | <0.001 <sup>a</sup>  | 16.58 (2.48)       | 14.13 (33.84) | -14.78     | <0.001 <sup>a</sup>  | 0.199 <sup>a</sup>            | <0.001 <sup>a</sup>            |
| <i>Trans fat</i>     | 0.63 (0.30)                  | 0.72 (0.49)   | 14.29      | 0.279 <sup>a</sup>   | 0.72 (0.15)        | 0.65 (0.29)   | -9.72      | 0.214 <sup>a</sup>   | 0.363 <sup>a</sup>            | 0.363 <sup>a</sup>             |
| <i>Alcohol</i>       | 1.63 (2.79)                  | 1.63 (2.79)   | 0.00       | 0.999 <sup>a</sup>   | 1.05 (1.30)        | 0.92 (1.26)   | -12.38     | 0.006 <sup>a</sup>   | 0.464 <sup>a</sup>            | 0.037 <sup>a</sup>             |

Data are presented as the mean (SD). a P <0.05 tested with Student t-test for dependent samples. b P <0.05 tested with Wilcoxon z-test for dependent samples. c Comparison within dietary groups (baseline and after 6 months). d Baseline differences between the AID and CD groups. e Differences after 6 months between the AID and CD groups. SFA, Saturated fatty acids; PUFA, Polyunsaturated fatty acids; MUFA, Monounsaturated fatty acids; Omega-3 FA, Omega-3 fatty acids; Omega-6 FA, Omega-6 fatty acids; TFA, Trans fatty acids

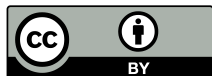

© 2020 by the authors. Submitted for possible open access publication under the terms and conditions of the Creative Commons Attribution (CC BY) license (<http://creativecommons.org/licenses/by/4.0/>).
